# Supplementary material for: A Microflow Cytometer with a Rectangular Quasi-Flat-Top Laser Spot
Source: MDPI journal article supplement (doi:10.3390/s16091474), 2016-09-11
Supplement: s1 [file s1]

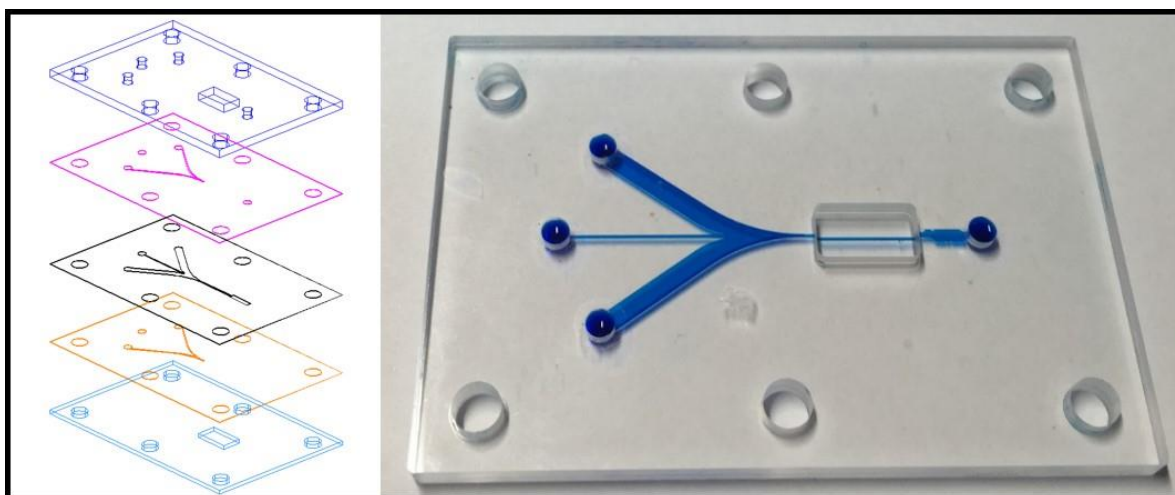

**Figure S1.** The focusing chip is made of five glass plates, of which the dimensions are 4 cm × 6 cm, and the microchannels are filled with a blue dye solution for visualization.

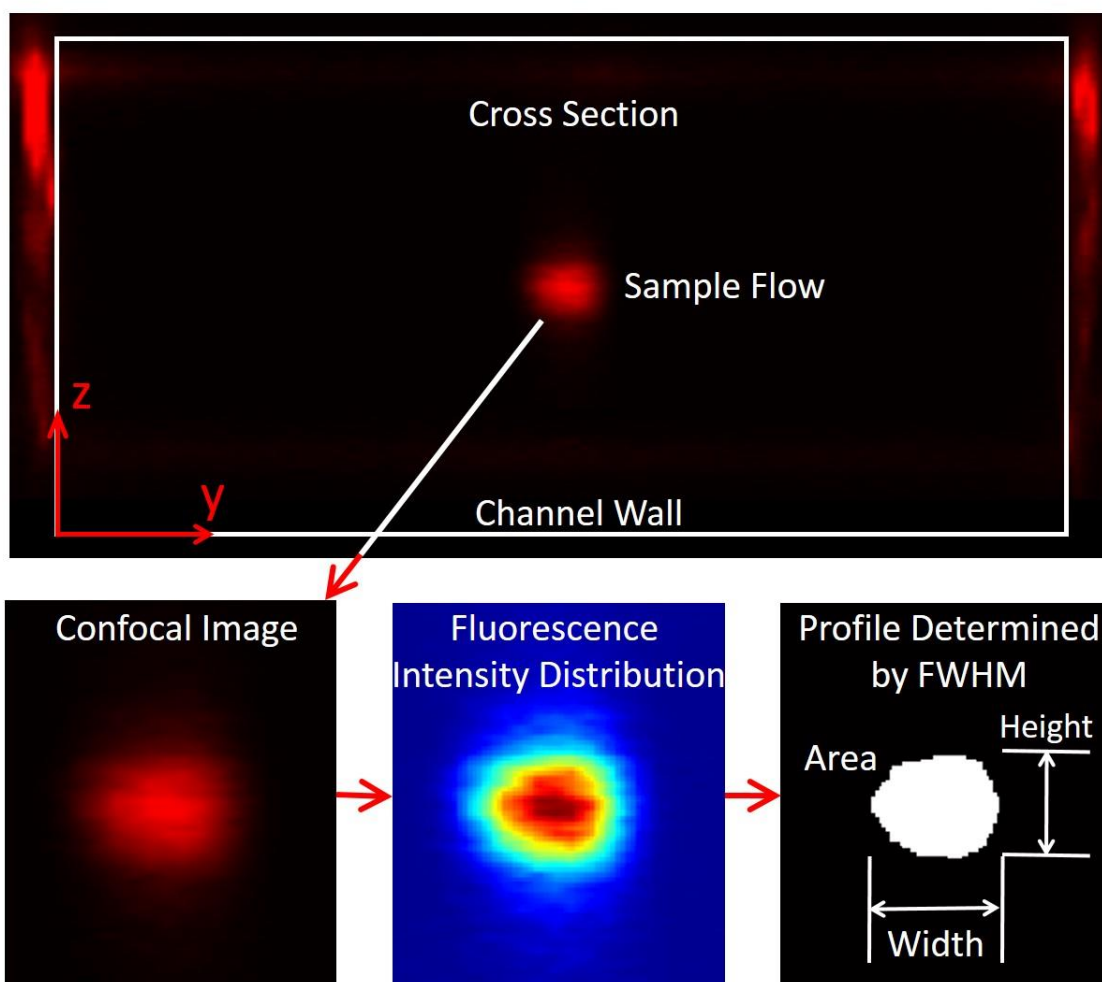

**Figure S2.** The cross-sectional dimensions of the sample flow are quantified using image processing.

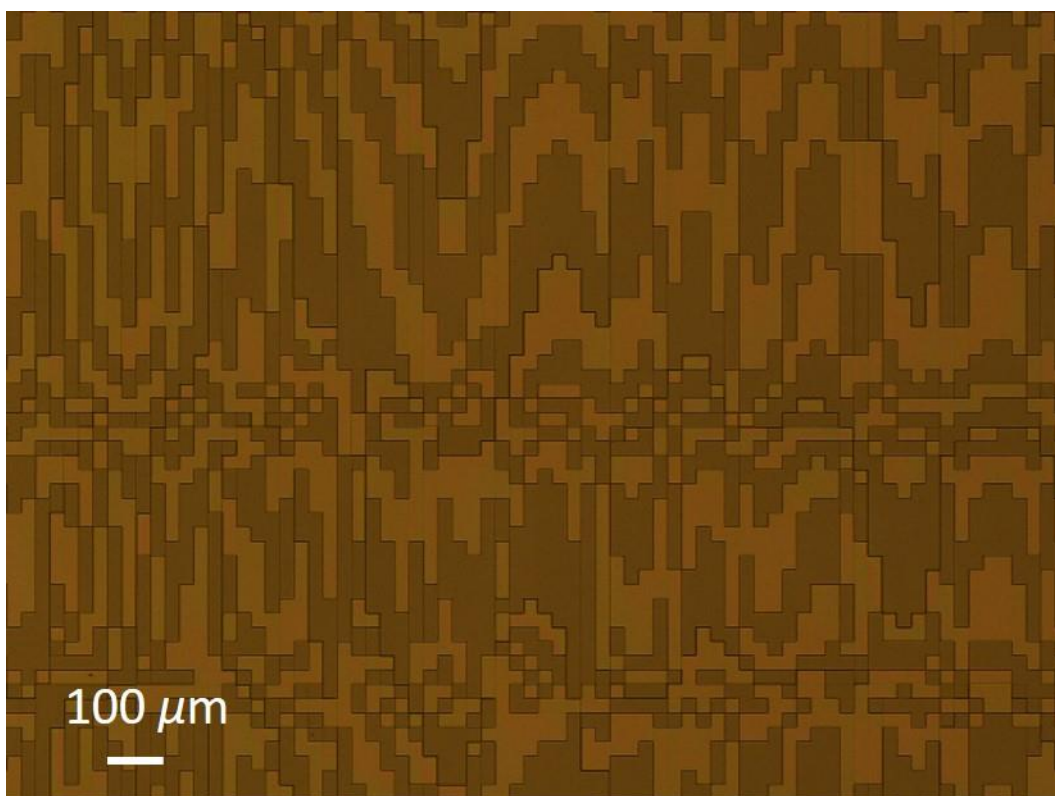

**Figure S3.** Part of the BOE.

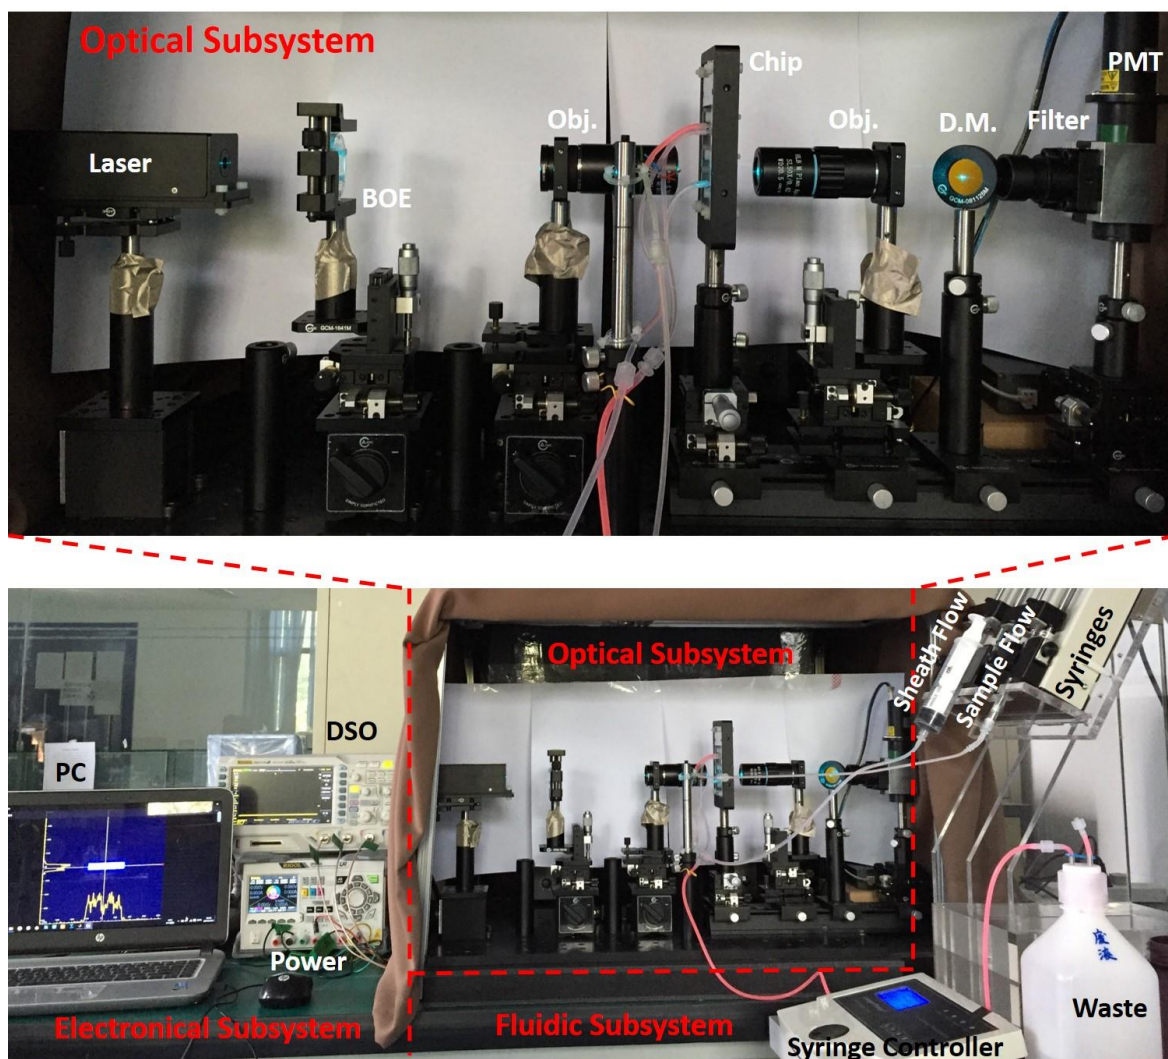

**Figure S4.** Photo of the microflow cytometer system.

**Video S1.** The amplitude fluctuation of fluorescence signal waveform increases with the sample flow rate.
